# Supplementary material
Source: Springer Nature journal article supplement (https://www.springermedizin.de/resource/supplementary/12955_2006_270_MOESM1_ESM.pdf/9560026)

**Person-Item Threshold Distribution**  
 (Grouping Set to Interval Length of 0.20 making 30 Groups)

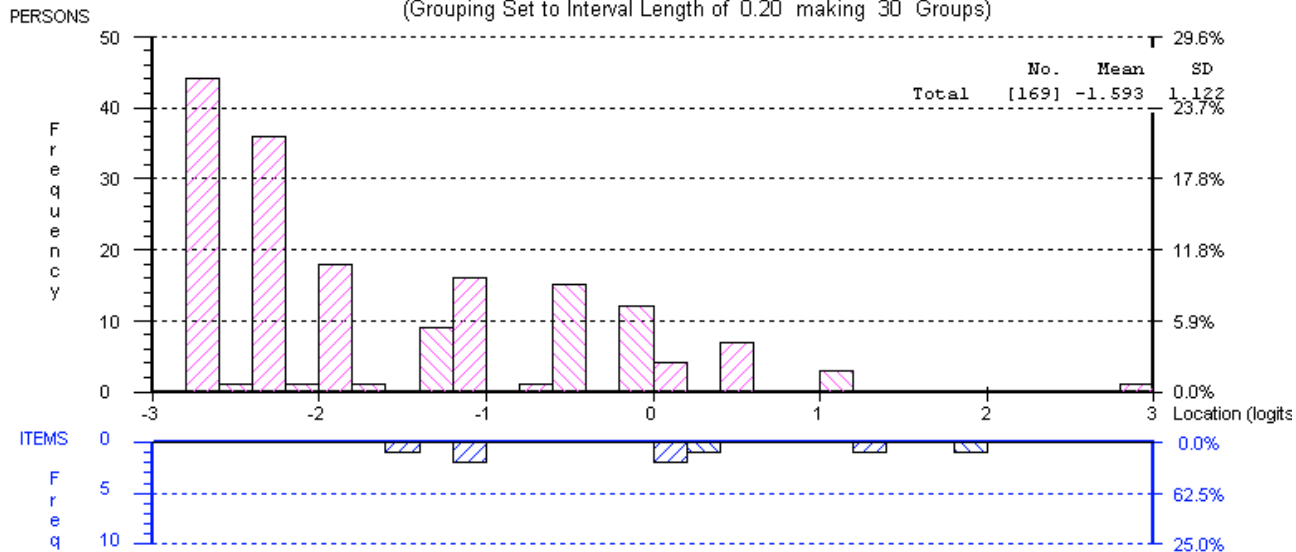

Supplement: MOESM1 [file 9560026]
